# Supplementary material for: Circulating tumor cells detected by lab-on-a-disc: Role in early diagnosis of gastric cancer
Source: PubMed Central journal article supplement (PMC5491173; doi:10.1371/journal.pone.0180251), 2017-06-29

수신자 : 부산대학교병원

제목: 의학연구윤리심의위원회(IRB) 심의 결과 보고

1. 본 기관 의학연구윤리심의위원회(IRB)에서 아래와 같이 심의하여 결과를 통보하여드립니다.

가. IRB NO. : H-1412-011-024

나. 연구 책임자 : 김광하 교수

다. 연구 과제명 : 위암 및 대장암 환자에서 혈액 순환 암세포의 유용성 평가

라. 심의 대상 : 연구계획심의 의뢰서

붙임: 의학연구윤리심의위원회(IRB) 심의결과통보서. 끝

부산대학교병원장

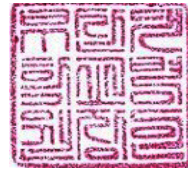

시행 연구윤리심의위원회 - 1412-006-001(2014.12.30) 접수 ( )

우 49241 부산광역시 서구 구덕로 179 부산대학교병원 /

전화 051-240-7000 / 전송 / / 공개

## 통지서

|                 |                                                                                                                                                                                                      |             |               |          |
|-----------------|------------------------------------------------------------------------------------------------------------------------------------------------------------------------------------------------------|-------------|---------------|----------|
| <b>수신</b>       | 의뢰기관                                                                                                                                                                                                 | 부산대학교병원     |               |          |
|                 | 연구책임자                                                                                                                                                                                                | (소속) 소화기내과  | (직위) 교수       | (성명) 김광하 |
| <b>IRB 과제번호</b> | H-H-1412-011-024                                                                                                                                                                                     | <b>심사내용</b> |               |          |
| <b>연구과제명</b>    | 위암 및 대장암 환자에서 혈액 순환 암세포의 유용성 평가                                                                                                                                                                      |             |               |          |
| <b>연구대상</b>     | <input type="checkbox"/> 의약품 <input type="checkbox"/> 의료기기 <input type="checkbox"/> 식품 <input type="checkbox"/> 화장품 <input type="checkbox"/> 시술법 <input checked="" type="checkbox"/> 기타( 진단법 )       |             |               |          |
|                 | <b>일반명<br/>(분류코드)</b>                                                                                                                                                                                | NA          | <b>상품명</b>    | NA       |
| <b>연구예정기간</b>   | 2014 년 12 월 30 일 ~ 2019 년 12 월 31 일                                                                                                                                                                  |             |               |          |
| <b>최초승인일자</b>   | 2014년 12월 30일 (정기보고주기 : 12개월)                                                                                                                                                                        |             |               |          |
| <b>승인기간</b>     | 2014년 12월 30일 ~ 2015년 12월 29일                                                                                                                                                                        |             |               |          |
| <b>심의종류</b>     | 정규심의                                                                                                                                                                                                 | <b>심의대상</b> | 연구계획심의 의뢰서    |          |
| <b>접수일자</b>     | 2014년 12월 15일                                                                                                                                                                                        | <b>심의일자</b> | 2014년 12월 30일 |          |
| <b>심의자료</b>     | 1. 임상시험 심의 의뢰서<br>2. 프로토콜요약자료<br>3. 임상시험계획서(Version1.0)<br>4. 증례기록서(Version1.0)<br>5. 대상자 동의서 및 설명문(Version1.0)<br>6. 연구자 이력서 및 교육이수증<br>7. 임상시험자서약서<br>8. 경제적 이해갈등관계내역<br>9. 연구비내역서<br>10. 대상자 보상규약 |             |               |          |
| <b>심의결과</b>     | 승인                                                                                                                                                                                                   |             |               |          |
| <b>심의의견</b>     |                                                                                                                                                                                                      |             |               |          |
| <b>중간보고여부</b>   | <input checked="" type="checkbox"/> 예 ( 보고시기 : 2015-12-29 ) <input type="checkbox"/> 아니오                                                                                                             |             |               |          |

- ※ 본 심사위원회는 ICH-GCP 및 KGCP를 준수하며, 생명윤리및안전에관한법률 등 관련법규를 준수합니다.
- ※ 이해갈등 관련 IRB 위원이 있는 경우 토론 및 결정과정에 참여하지 못하도록 위원장이 조치하였습니다.
- ※ 만약 본 위원회의 심의결과에 불복할 경우, 심의결과 통보 후 그 사유를 기록하여 이의를 신청할 수 있습니다.
- ※ 본 심사위원회에서 통지한 대로 연구기간 1년마다 지속심의의뢰서를,중간보고 기간에 중간보고서를 연구 종료 시에는 종료보고서를 제출해주시고 종료보고서 제출 후 1년 안에 결과보고서를 제출해 주시기 바랍니다.
- ※ 연구 중에 중대한 이상반응 발생 시 연구책임자는 본 위원회에 즉시 보고해야 합니다.
- ※ 본 임상연구 결과를 임상시험실시기관의 사전 서면동의 없이는 어떤 경우라도 학술목적 이외에 실시기관명을 사용할 수 없습니다.
- ※ 본 통지서는 KGCP 제 13조 1항에 따른 심사 통보서로 사용할 수 있습니다.
- ※ 심사위원회의 결정사항에 대해 이의가 있는 경우 이의신청 절차에 따라 2회까지 이의신청이 가능합니다.

부 산 대 학 교 명  
임 상 시 험 심 사 위 원

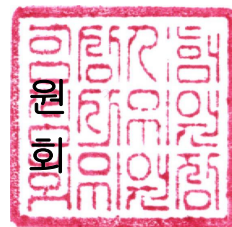

Supplement: pone.0180251.s001.pdf [file pone.0180251.s001.pdf]
